# Supplementary material
Source: ML conference proceedings conference paper supplement (https://openreview.net/forum?id=e2MCL6hObn)
Supplement: supplementary_material [file attachment]

## 443 A Plaid framework details

444 We perform all forward and backward computations in double precision except for the Transformer  
 445 layers themselves, which happen in `bfloat16` mixed precision. This comes at a negligible extra cost  
 446 since the Transformer layers dominate the overall cost.

447 **Architecture choices** We condition  $\hat{x}_\theta(z_t)$  on the timestep  $t$  by adding a sinusoidal encoding of  $t$   
 448 to the Transformer’s residual stream before the first layer. Before feeding  $z_t$  into the Transformer, we  
 449 rescale it by a factor of  $\sqrt{1 + \sigma^2(t)}$  which makes each input dimension approximately unit-variance.  
 450 Whereas autoregressive Transformers are relatively insensitive to aspect ratio [15], we find that Plaid  
 451 performance increases significantly with Transformer depth up to about 16 layers. We also find that  
 452 performance is sensitive to the choice of embedding dimension, with small values performing best.  
 453 In all experiments, we use embedding dimension 16.

454 **Stochastic sequence length** Unlike autoregressive models, diffusion language models can only  
 455 operate on sequences of exactly the same length as those seen during training. To enable our model  
 456 to generalize to shorter sequence lengths, we truncate a small random subset of examples seen  
 457 during training to random lengths. We observe that truncating even 3% of examples allows the  
 458 model to generalize well across lengths without impacting full-length performance. Short-sequence  
 459 performance does not improve substantially as we increase the number of truncated examples.

## 460 B VLB and heuristic weight schedules

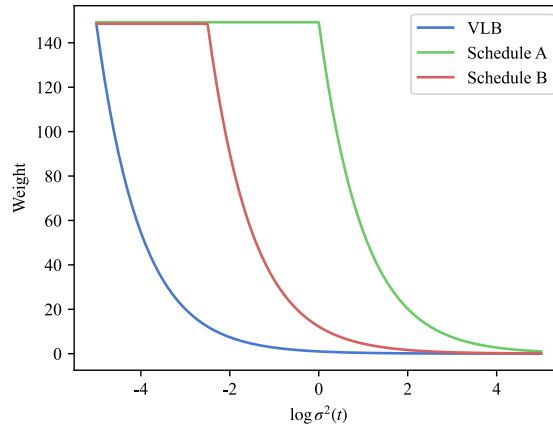

Figure 3: VLB weight schedule and heuristic weight schedules used in ablation experiments.

## 461 C Experiment details

### 462 C.1 Dataset

463 Unless otherwise noted, all models in this work are trained on a subset of OpenWebText2 [7] which  
 464 we filter to remove documents labeled as non-English. The data is tokenized using a 32K-token BPE  
 465 tokenizer which we train on the OpenWebText2 training split.

### 466 C.2 Architecture

467 We use standard pre-activation Transformers models with RMSNorm normalization layers and GeLU  
 468 nonlinearities throughout. Unless otherwise noted, all Plaid models have 16 Transformer layers,  
 469 which we found to be approximately optimal for our scale. We scale autoregressive model depth  
 470 approximately following [20]. For efficiency, our implementation uses FlashAttention [4] and other  
 471 fused kernels wherever applicable. We train at sequence length 256 for all experiments except Plaid  
 472 1B.

### 473 C.3 Optimization

474 We optimize all models using AdamW with parameter-specific learning rates derived by  $\mu$ Transfer  
 475 [34] based on a learning rate of  $1.4 \times 10^{-3}$  at width 256. Each parameter’s weight decay is set to  
 476  $\frac{4 \times 10^{-5}}{\eta}$  where  $\eta$  is that parameter’s learning rate. We use a linear warmup on the learning rate and  
 477 weight decay over the first 2500 steps, followed by a linear decay to zero over training. We train at  
 478 batch size 256 for algorithm ablations and 128 for scaling law experiments.

### 479 C.4 Plaid 1B Training

480 We increase the base  $\mu$ Transfer learning rate to  $2 \times 10^{-3}$  (at width 256). The denoiser network is a  
 481 Transformer with 24 layers of width 2048 and a vocabulary size of 32K tokens, for a total of 1.3B  
 482 parameters. We train for 1.2M steps at batch size 256 and sequence length 1024, for a total of 314B  
 483 tokens. All other details are as written above.

## 484 D IsoFLOP profiles

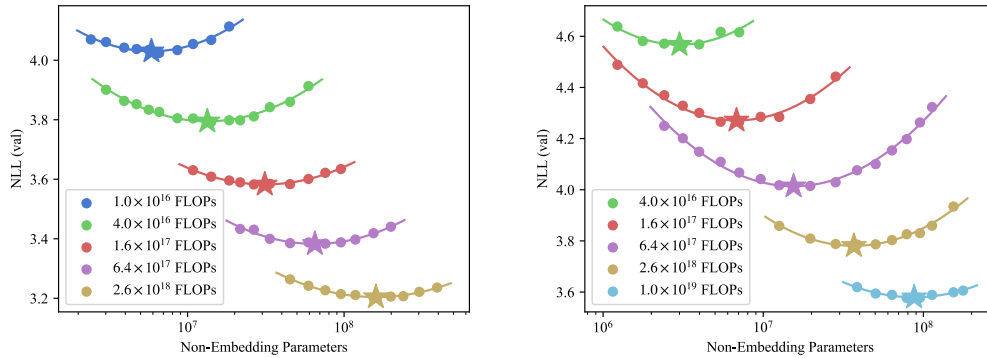

Figure 4: IsoFLOP profiles for autoregressive models (left) and diffusion models (right).

## E Plaid 1B Random Samples

### E.1 Unconditional

tends to create a ripple effect in the economy, and economist Kevin Milligan said it's probably a testament to how worn-down the economy and consumers are, particularly at the low end. "It's probably due to things like investment slowing in the natural resource sector, weakness in stock buybacks in the corporate sector, corporatism. And, of course, (we) have to look at things about what the Bank of Canada is doing, the uncertainty on the horizon in terms of trade, and the exchange rate, and all of these things tend to pull down the economy, particularly the low end." Tweet This "I think the economy in general has been feeling the squeeze of low credit rates, (and) especially low mortgage rates," he said. "Story continues below advertisement" "It's difficult to be selling at rates well below their 10-year average, so I think those effects do come back into the economy as well, and I'd wonder if it's pulling down consumption and investment activity." "Consumers and businesses are really looking for more and more type of stimulus action not just from the Bank of Canada, but from the federal government too, he added. "He said they're not getting a message from Canadians about the state of the economy and he thinks many people are wondering if they did get that message from Prime Minister Justin Trudeau in December. "I'd be happy for people to hear a message, and that has to come through," he said. "Despite the second interest rate hike, Milligan said there's reason to think the odds of an interest rate hike have risen from about one-third to about two-thirds in the first part of next year. "I would, on balance, expect a sustained number of rate hikes - even a third hike." Tweet This "He said those predictions are becoming more consistent as well, with a reported saying from economist Chew Ross this week that most economists consider a fourth rate hike a 'near certainty' for 2019. "Milligan said he's optimistic about the economy in Canada. "I think we're probably in the middle of seeing a strong bottom and picking back up on a strong GDP, and we're very much into this directional trend for the economy now that we see." Tweet This "Story continues below advertisement" "I think we're on track for a run of three straight years of zero- to one-per cent of GDP growth, which would be quite strong. And we're not quite back at an extended bottom. "But I think we were probably hitting close to bottom in the recession in 2009, and we're clearly in that situation. So at some point, you want to move up, and of course, one reason would be another surge in the economy." "Asked if the possibility of a fourth rate hike in 2019 could help business sentiment going into the federal election, Milligan said heightened expectations are always a good thing. "He also said there's more opportunity for the Bank of Canada to announce some form of monetary policy stimulus following the second interest rate hike at its next policy meeting, and financial markets around the world would likely rise in response to such a move. "Story continues below advertisement" "But if they've absorbed the downside of those rate hikes in other ways, I'm not convinced that they are their biggest concern in terms of their intentions." "With files from Bloomberg" "A man has been arrested for allegedly crashing into a group of three children walking close to Ariana Grande from London's Electric 6 Club. "The three three-year-olds and their father were walking to the singer's home from London's Shelter Art after the show when they came across a black sports car driving at about 85 mph. "The unidentified man, who is believed to be the driver of the 'sorry', passed them about 15 or 20 metres suddenly and one child was caught up in a collision at the rear, the Metropolitan Police said. "The girl was not hit by the car, the Evening Standard reports. "The driver, arrested on suspicion of driving while working and driving recklessly, has been released on court bail without further comment. "Following the incident, the girl was rushed to hospital with an urgent call for coronary arrest due to severe shock. The child's parents expressed their shock at the 'serious' incident, Sky News reports. "JUST IN: 'The Queen was targeted': UK Police offer exact timings for 'targeting' terror attack on the Royal Family <https://t.co/gCJaJnaAi> - Breitbart London (@BreitbartLondon) February 13, 2019 "Responding to the incident, Ariana Grande tweeted: "Was to @Metez show in #London last night! We will not forget those in the early

+147402] Gibdobber (19.55) [157000+148691] Arch-Princess (19.53) [157000+147720] Snow White (19.42) [157000+147790] Magdalene (19.41) [157000+148447] Corrin (18.93) [157000+148068] Pinocchio (18.92) [157000+148396] Ayya (18.85) [157000+148384] Alaina (18.84) [157000+148384] Olaf (17.76) [157000+148791] Chu (17.72) [157000+148493] Robin (17.62) [157000+147823] Papyrus (17.64) [157000+148396] Elsa (17.64) [157000+148384] Galt (17.62) [157000+148659] Marie (16.52) [157000+148659] Anna (16.52) [157000+148597] Leon (16.52) [157000+148697] Paul (16.48) [157000+148697] Reg (16.46) [157000+148697] Shu (16.44) [157000+148659] Aurora (16.43) [157000+148597] Heinrich (16.33) [157000+147798] Perraman (16.01) [157000+148696] Peter (15.91) [157000+148592] Papyrus (15.72) [157000+148596] Arch-Maid (15.72) [157000+148069] Belldobber (15.66) [157000+148396] Corrin (15.64) [157000+148591] Helena (15.60) [157000+148397] Hazel (15.57) [157000+148594] Alva (15.56) [157000+148653] Olaf (15.53) [157000+148149] Anna (15.53) [157000+148597] Hans (14.49) [157000+148597] Heinrich (14.43) [157000+148657] Aurora (13.42) [157000+148656] Shu (13.38) [157000+147823] Arch-Princess (13.329) [157000+147692] Elsa (13.37) [157000+148597] Tamara (13.37) [157000+148437] Richard (13.36) [157000+148575] Galt (13.35) [157000+148144] Reg (13.34) [157000+148256] Arthur (13.33) [157000+148659] Papyrus (13.27) [157000+148697] Arthur (13.24) [157000+148109] Peter (13.24) [157000+148597] Chu (13.17) [157000+14785] Marie (13.08) [157000+148659] Anna (13.08) [157000+148659] Paul (13.07) [157000+148657] Magdalene (13.07) [157000+147780] Galt (13.07) [157000+147780] Olaf (13.06) [157000+148255] Reg (13.05) [157000+148255] Richard (13.04) [157000+148255] Arch-Princess (13.02) [157000+148596] Aurora (13.02) [157000+148596] Heinrich (13.01) Perraman (12.82) [157000+148696] Hans (12.70) [157000+148349] Papyrus (

, and occasionally some of our recommendations may have changed. With that said, if you choose to buy something using the retail links included in this post, Altdica may earn a small commission. However, all of our product reviews are written by independent experts with no relevant agenda to consideration. "This is about the people," said lead attorney Steven Holstein, a Philadelphia lawyer who represented the company targeted by the state robbery task force in the case. "When some nut across the state has the ability to write a constitutional amendment and rewrite a constitutional amendment in a way that makes it antithetical to the state of Pennsylvania, and say they are against it ... then it doesn't really matter what the people of Pennsylvania want." "Police officers were paid an extra £425 for each working hour in 2019, despite many of the people involved in the high-profile Windhouse scandal being involved in front-line duties, a service review has revealed. "The total pay paid in 2019 was a minimum of £42,487, while officers earned a maximum of £38,254 - with an average hourly pay increase of £2.46 per hour. "The salaries amount to an average hourly pay rise of more than £5 between June 2018 and June 2019. "Financing of officers' services rose by 7% in the past year over the previous year, the report by the Association of National Police Officers (ANPO) revealed. Investment in non-police trusts rose by 17% in the same period. "ANPO chief executive Brian Kirk said: "Police officers rightly want to be rewarded for their service, so they do not have to choose between keeping communities safe and delivering good policing. "This extra pay enables police officers to consider new career opportunities, provide support to those most in need and promote social inclusion. "The Scottish Government said in 2017 the police service had more than 23,000 officers, a third of whom were front-line. "The current pay structure was introduced in the late 1990s to compensate officers in frontline commands with high crime rates. "Scottish Labour Shadow Justice secretary Michael Russell said the fact officers were getting paid adequately showed "something urgently needs to be done". "He said: "It's completely bonkers that taxpayers would expect to cough up an extra £425 per hour for a police officer's shift, especially when frontline staff like health workers, social services, fire and ambulance continue to face regular annual cuts. "I can hardly believe ministers continue to grant hugely lucrative contracts, while freezing its core wages, to a health service which is already struggling as a result of huge budget cuts, and which the SNP has consistently opened up as a no-go

zone over the last four years.\n\nWhy have ministers allowed higher officer salaries in the police while they have delivered a decade of devastating budget cuts to the NHS?"\n\nScottish Liberal Democrat leader Willie Rennie said: "It is notable that there has been a significant improvement to current pay arrangements in relation to cover officer roles.\n\nHowever, any rise in pay for the workforce would also need to be brought in line with the huge cuts we have already seen in frontline services.\n\nThe Scottish Government showed how they last week awarded zero-cost contracts for labour companies without even looking at what the work cost, and the clear message is that they are keen on making frontline organisations look more modest rather than worrying about budget cuts.\n\nThere will be more of the usual bonuses coming before the Government shows how finance and good colleagues will be putting a concerted effort together to find some resources to offset some of these increased costs, instead of deciding the way to save the workforce is a cutters field." \n\nNicola Rowland, the general secretary of the RNQ, said: "Front line firefighters and police officers are asked to endure some of the most distressing things on a daily basis." \n\nThe average police officer pay rose to £43,085 in 2019, after a two-year increase, the ANPO said. \n\nThe rise in law enforcement is seen to have been caused by an ageing population and the overseas population and the deepening of recent job cuts in the Scottish public sector. \n\nPASADENA, Calif. (KABC) -- A 17-month-old girl has been returned to the Potnora Police Department Monday afternoon. She was taken from a home in the 3400 block of Ponderosa Avenue near Fairfax Boulevard and Lelgar Street. Police say it is believed that the child, who is staying with her family, was taken from her home between July 20 to July 22. Forensic testing will likely be performed later this week. \n\nIt was an odd fun fact that made many left-wing activists vehemently oppose the nomination of Brett Kavanaugh to the U.S. Supreme Court. On his yearbook page was a subnote entitled "Don't Let Them F\*\*\*\*\* Your Body Forever," a reference to the oral contrace

of carbon emissions needed to meet the 2 degree Celsius target set forth in the last assessment of the Intergovernmental Panel on Climate Change (IPCC) in 2013. New research rolled out at an annual scientist meeting finds that the industry will need to recover between 4,000 and 10,000 tons every year of fracked and produced oil and gas fossil reserves in order to do that, according to an analysis done by lead author Dr. Ernesto Monteiro of the University of Alberta in Canada. \n\nThe eye-watering figure represents the total amount of oil and gas - shale and natural gas produced, extracted and sold - will likely need to be recovered in coming years to meet the carbon mitigation goals. The amount where between 4,000 and 10,000 metric tons of reserves for every 10 metric tons of carbon dioxide they displaced. \n\nThe benefits of carbon capture increase with the amount being injected," Monteiro wrote in an article accepted to publish in the Proceedings of the National Academy of Sciences which DeSmog obtained last week. \n\nWhile the theoretical ability to limit 2 C warming with fossil fuel carbon budgets is obvious, such action is not taken by the oil and gas industry. Industry groups led by RRC openly seek to capture 38 million tons of carbon dioxide emissions annually from operating reserves and transfer a portion of that back to the oil industry as revenues. "Comparing natural gas reserves under production with proven oil reserves remaining reveals one potential implication, which is the additional natural gas production that would be required to fully satisfy the 2100 oil supply balance," the paper explained. By Monteiro's estimates, natural gas production will grow by the equivalent of about 4 Gb per year by 2100, while at the same time oil production will decline at about 1 Gb per year, or a total of 2.66 Gb per year in balance. If all the resources at hand could be extracted, of which no amount is available at all times, it would be practical to use all of that fossil fuel along with existing operating wells. But as natural gas production rises, new wells could replace declining oil production with an equivalent number of fossil fuels to reserves. \n\nCarbon reductions at any level involve "costs" - additional expenditures that necessarily arise from oil and gas extraction and associated energy production, including physical production, liquefaction capability, handling and shipping fees. The research found oil and gas companies bid to recover as much natural gas as possible at all early stages of exploration and production. Natural gas, while more profitable, is much riskier than coal. The paper explains: "Extracting and producing natural gas exploits the time, location and physical composition of the fossil record. Each well represents a different geological formation with different natural gas characteristics. These characteristics mean that the amount of natural gas recovered from a well is not determinative of the productivity of the well from which it is extracted. Reference reserves provide an indication of the natural gas resources that may exist in different shale formations and the potential of these resources based on past and future discoveries." \n\nThe only kind of geomorphological formation that can be considered very promising for oil and gas production are mesopolar formations, those within one mile from surface to three miles below ground. Mesopolar formations are generally regarded as more inflexible than permafrost or acid shale formations, less stable than other subsurface formations or fracked tight rock, more susceptible to seepage, and more susceptible to oil production costs. For these reasons, the reserve estimate put out at the annual meeting does not consider natural gas production to be an economic viability from existing mesopoint formations. \n\nThe net result is that the industry will lose out on billions of dollars in revenues to pay part of the cost of carbon sequestering, underground scrubber systems and other forms of carbon capture from any new natural gas reserves of coming years. In order to fuel plants, the primary gas is oxygen; when undertaking oil and gas production and development that oxygen is extracted from the air and converted into methane that is vented through rock. It then is dispersed at the surface using various methods, such as proximity to carbon sequestration facilities and underground scrubber systems, to provide the chance to store carbon dioxide that would otherwise have been leaked back into the atmosphere. \n\nIn 2014, a team of scientists from the National Academies of Sciences calculated that deferring as many as 3000 metric tons of carbon dioxide emitted from oil and gas reserves already on Earth to new ones would come at a cost of 5 cents annually to the oil industry per ton. Revenues would then be about \$35-60 billion. "Financials indicate that nonconventional expenditures, including relatively large ones, will have a material net impact on industry and substantial constraints on operating income and free cash flow," the team concluded in a report published in an academic journal prepared for the annual meeting of the National Academies of Sciences. It concluded that the finance companies that actually receive profits from the stranded reserves, which offer little more than \$4

] have the Senate convict a sitting president." \n\nOn Wednesday, after the House Judiciary Committee drew up articles of impeachment, McConnell announced that "we have the votes to convict the president." \n\nTrump also held a rally, in which he decried the process as "an illegal coup against me," and announced that he would "appeal." The rally seemed to show that the fight wasn't over. \n\nWATCH: \n\nThis is not a tragedy," McConnell said in a statement at the time. "I am convinced, with every fiber of my being, that the President is innocent. Having solicited the articles of impeachment from the House, the Senate looks forward to hearing from House managers on the charges and then moving forward to presenting a case for trial by the full Senate." \n\nTrump's GOP rivals and independent senators like Sen. Lisa Murkowski (R-AK) have publicly supported impeaching the president, while other GOP senators, like Sen. Susan Collins (R-ME) have openly said they could resign. \n\nThe first major impeachment defection came on Sunday when longshot Rep. Justin Amash (R-MI) announced his intention to convict. In an email to his colleagues, Amash Jr., who criticized Trump's actions in the months leading to and through the impeachment, said he was voting to convict. \n\nFrom where I sit, the evidence is overwhelming. As I am a member of the Judiciary and Intelligence Committees, I have a duty to the American people, as well as an obligation to my constituents and all who sent me to office, to vote convict," Amash said. \n\nThe Barcelona Golf Course doesn't look like a golf course, but it is an oasis for gardening in this busy city. \n\nIt's a massive course spread over 120 acres with fairways that are split right down the middle, unlike the designs on most golf courses. The course enjoys the stunning view of the skyline above it. \n\nA giant oak tree almost 40 meters in diameter serves as one main highlight to the golf course's design. The course's 6,486 holes - some six times downhill - are a real treat for newbies and even seasoned golfers. \n\nArcadia for 120 acres was built around Gillet Park Golf Club, an exclusive private mixed-use development. Vergara Andreana's team served as the architect for the golf course, with the course designed by 110 Architecture, the local firm working exclusively with Barca, the city's Professional Football club. \n\nEven though Andreana is the lead architect on the

project, the team was tasked with creating other lifelines around the course as well as the concrete facade. Aside from the course, Vergara and Andreana have been involved with at least 20 different, publicly developed projects in Barcelona. Design has to be sustainable. Vergara and Andreana became aware of the Barcelona Golf Course while participating in an environmental conference. They recalled being surprised by the site's design, which helped to heighten their enthusiasm for the project. "Because we are architects, architecture has to be sustainable, either low energy or low/zero carbon," Andreana says. "We also want challenges for new projects." Vergara and Andreana started in landscape architecture in 1995. At the time, they were involved with relatively small projects located in the tourism sector. Elsewhere, Vergara and Andreana were searching for a community garden to allow families and people to experience the magic of nature exploration and gardening. "We are a architect's team and we want to improve the urban environment for our users," Andreana says. The team began to look for a place to design a nine-hole golf course. In June 2013, they found a spare garden filled with lush grass located in a meadow. A great opportunity for diversification. Andreana's team researched other urban golf courses for the right location. In the end, Gillet Park Golf Club stood out as the best option. Although the natural gardens needed a restoration for their natural conservation, the size and location of the golf course offered a unique opportunity to beautify and reinvest in the urban environment. Gillet Park Playground met all the criteria," Vergara and Andreana explain. "It's not very specific, suited the golf course, and had all the right vegetation." Vergara and Andreana spent just nine months planting thousands of trees in the western corner of Gillet Park, in the neighborhood of Joan Mariscal. The new golf course is accessible on the area's busy streets with shops and restaurants, so the community can enjoy all the leisure activities in the green space. The team uprooted the previously existing Pérez Tree, to make room for the new trees to complement Gillet Park. It was a quick and convenient solution

however it requires two-piece manual construction, which the designer does with great skill. Cuboys does great detail work, the whole body is mostly to scale, with the obvious exception of the sword guard. His arms and legs are also well detailed and the model has pretty good proportions. There are still some details that could probably do with a little more refinement that I didn't catch, but in general I like the overall look of this model and it really feels realistic. In all I was quite impressed, the model is put together with great materials, good use of miniatures and nice detailed details that are really visible. This is most definitely another excellent example of modular construction in action. NEW ROWFORD, Conn. - A man with schizophrenia faces charges for punching a 15-year-old boy in the head before using a tire iron to strike the youngster in New Bedford, according to police. Just before midnight Wednesday night, New Bedford police responded to Liberty Mill Avenue and 66th Street for reports of a non-consensual felony battery, according to police Lt. Mark Reed. A child wielding boy, 15, was allegedly approached by a man with a Southern accent and mustache, who started to beat the boy before pulling out a tire iron, the lieutenant said. The suspect continued his assault after the boy's forehead was burned with the iron. Reticosis to the boy's face required additional stitches, Reed said. The suspect is charged with first-degree assault and faces up to five years in prison. Today, a massive tree fell off a road in the famed resort town of Rosengård, Poland. As of now, there have been no injury reports; however, witnesses told Poland's TNT radio station that the trunk of the tree stood at least 3.5 meters tall. It was almost completely blocking the road used to enter the popular ski resort town. According to report, the base of the tree has fallen, but the abrupt all-round fall still seems a rather odd way for a tree of such nature to fall. Local media speculated that a branch had come down, but said that "it's couldn't be ruled out." Miraculously, there have only been a handful of injuries, presumably from the rogue trunk. The road is still under reconstruction in some areas, and a single tree of this size and age toppling on any foundation should not do any real damage. It is reported that the tree will be removed and reburied. Local emergency crews are still being dispatched to deal with the situation. However, the tree has reportedly now been removed and the road is now open. A supermarket and McDonald's have already re-established. The base of the tree that fell in Rosengård. The remaining trunk fell and caused no injuries. Credit: Peter Owen <http://m.flickr.com/photo.php?worldid=126161&category=166902&tif> Source: The Man Who Saw Mountains by Bill Winter The resort as was planned. 1978. Two alleged thefts gained entry into a home in the 3300 block of North Monroe Street with guns blazing Monday evening. Residents attempted to make entry. Key Details: Two thefts reportedly gained access to the home as residents were outside and were attempting to lock their homes. One thepper pulled his gun, out of the house. The other person than reportedly pointed his gun at the one man. However, no shots were fired. Police tell 7NEWS the alleged thieves did already know each other. At least three other thefts were reported Monday evening. No word yet if these two thefts could be a connection. Jorge Miles Taleb Daily Stormer July 8, 2013 The shooting at a Tucson white supremacist rally night is the latest in a string of recent terrorist incidents at white supremacist centers. It follows a mass shooting at the Oregon State Capital District in June ending with 9 people in Seattle, Washington, and one of two people in Midland, Texas being killed in the attack. After witnessing these tragedies, people have actually reacted in a predictable way, and pointed towards the problem of white supremacists and violence being the real problem that's plaguing America. According to reports from the mainstream media, the shooters were not from Oregon or Texas, suggesting that they may not have been driven by white supremacists, given the recent history of racially motivated attacks while many there were also confused by the motive of the shooters. The shooting took place at a rally that mentioned the Patriot, but their movement is civil disobedience of the federal government. This of course is considered unacceptable and unacceptable by many of those who run the national movement, as it goes against their view that the role of government should be eliminated. Though they do denounce the Occupy movement which is based

Alexandra Firth reports on the association between higher rates of smoking in the adolescent stages and higher obesity in subsequent stages. Like Ridley, Whitfield concludes that this means "even if you're at the bottom you're one generation away from obesity". This is certainly true, though there are two big problems with it. First, BAME adults tend to be smoking at much later ages than those in the adolescent stages, on average at a later age of 34. This means that there is a causal relationship between smoking and poverty that is not present when we control for poverty or look at controlled factors. The degree of economic segregation, or the factor that \*controls\* the wealth gap - household income according to dollar index - is not nearly as strongly correlated with elevated smoking rates among the lowest part of the income distribution (Harrison and Strauss-Daly, 2006, 48-49). A higher part of the income distribution tends to have higher smoking rates, so the level of cigarette consumption is in fact correlated with the degree of economic mobility (though it's important to note that it is higher status that has the higher rate of shoplifting). On the other hand, economic mobility does not seem to be correlated with the causal relationship between smoking in early adulthood and obesity in later adulthood. This means that being at the top of the income distribution does not necessarily give someone "higher" status, or more privileged. Second, even if you control for socioeconomic status, people who are more likely to have higher rates of smoking in early adulthood tend to have to higher rates of obesity in later adulthood than those who are less economically privileged, and there's no way that one can infer "teens away" from this, seeing as there is no causal relationship between smoking and mobility, and no threshold beyond the top of the income scale that is exhibiting an upward trajectory. It is certainly true that a greater proportion of BAME adolescents from families with lower incomes are on average less likely to smoke. Curiously, Whitfield doesn't mention that socioeconomic mobility differs significantly between different income groups, so this kind of relationship can't be replicated. There is no causal relation, but speaking, just because those at one top of the income scale are more likely to see their kids try cigarettes, does not mean an ongoing predisposition towards obesity (or even smoking). Even though it can't be proven, and just because it sure seems to incite a fairly clear upward trajectory of mobility for people at the top of the income distribution, Whitfield is basically saying people who have higher rates of adolescent smoking are poor, and not vice versa. This is another misinterpretation/misuse of statistics in public health, and a serious stretch for an economic science that is considered relatively bias-free by its supporters and anti-economists alike. Taking the long view: When statistical

models have (pertature) interpretations\n\nIn the same interview Whitfield also makes another somewhat questionable claim, regarding cigarette smoking and childhood obesity. After finding out that there is no significant causal relationship outside of the early stages with the level of smoking, he said:\n\nPeople are now wondering why you would try to avoid the early stages if there is so little causal connection. There is always going to be something in there about healthy early drinking and preventing an artificial transition.\n\nThe simple fact is that statistical models don't get to consider a person's personal interpretations. A model that shows there is no adverse relationship between smoking and obesity in the young stages does not come close to considering the personal call on the risk of smoking in the middle stages; if it is harmful for all, what is the benefit? To understand how interpretations like this are sometimes folded into public health policy I think it's helpful to understand the science. Statistical models do not allow people to tease different factors apart, with differentiated trade-offs. Instead, it requires that you take into account all of the factors, and come up with the best predicted outcome. Even if one of these models has conflicting statistical data, there is no concept of statistical meta-analysis as we have in the sciences.\n\nFor example, Whitfield still needs to ask:\n\nif diet is additive, and therefore a lot of people would develop a nicotine habit, then, why not just go back to a golden age?\n\nIn my view, trying to use statistics to smooth out the science by ignoring personal interpretations only tells you that he thinks the personal interpretations are important to begin with. A lot more effort is taken by the personal interpretations than by statistical models, but that's why the interpretations are more valuable (to the public and policy makers). The general principle is the same: some probabilities exist in the real world, some interpretations are valuable, and members of the public can legitimately base their decisions on the personal interpretations; not the statistical models. We can try to avoid the rich (but the healthy may not be avoided, they just have more early

Heapangi - we've got some nice note floating about, there are lots of them, but unfortunately there are a lot of plastics.\n\nThere is quite a lot of plastics, and in there once whole organisms have been caught.\n\nJust over a million skinks had been found, and surveys suggested the number could be much higher, said litter management and marine life recovery manager Mike Sewell.\n\nNew Zealand has experienced similar spikes on hatching sea finches and some sea turtles.\n\nThe problem started in rivers on Picton and the Great Barrier Reef and then grew in the southern fork of the Kaimana River.\n\nThe drifting will be around for at least 50 years, Sewell said.\n\nIt's not easy for plastics to live in marine ecosystems, but it's not that difficult to spread around.\n\nDAVID WHITE/STUFF The Southern Eyre blue swallow lives under some of the heaviest ocean waters in the world.\n\nDAVID WHITE/STUFF A Penigan's seahorse in the Kaimana.\n\nDAVID WHITE/STUFF Part of a cephalopod in the Kaimana.\n\nPolluted skim chutes were found at the southern end of the Great Barrier Reef on Picton, in the Tongariro gorge on the Kermadec Peninsula and Matamata.\n\nThe contaminated debris had been added to a variety of local coastal feets.\n\nDAVID WHITE/STUFF A cephalopod in the Pennou.\n\nOne kilogram of contaminated rubbish was found in Kaimana's skink chicks.\n\nDr David Wilson, the NIWA's acting director of pollution science and surveying in Wellington, said plastics were by far the biggest threat to the Great Barrier Reef - which was polluted with more plastic than found in the whole of Europe.\n\nThis skim pollution highlights the danger of single-use plastics, which are killing corals and sensitive wildlife," he said.\n\nDANIEL BURNELL/STUFF A xanthopod remains stranded in the Kaimana.\n\nConservationists were keen to see more measures in place to protect the oceans.\n\nWith plastics we would really like to see a strong standard - something to really harden the rubbish problem.\n\nPolymers are often dumped in NZ to waste, and then plastics are imported here from overseas and recycled.\n\nDANIEL BURNELL/STUFF A harp's shell lives in the Kaimana.\n\nA group of commercial and freshwater anglers has called for a stronger global filter standard to protect fishermen from microplastics, but it has not yet been adopted.\n\nFor sure we need more flow packaging - there are alternatives.\n\nSewell said about 150,000 skims settle on humps each year, more than five times the number on sea finches last year.\n\nOn the blue plug mat we have also seen a lot of skim," he said.\n\nThey got stuck last year and a similar number have been seen this year, although they are not gathering on us as much on the blue plug bog in Kaimana.\n\nPlastic for human use is not allowed to sell in New Zealand, but manufacturers have produced cheaper plastics with higher concentrations of chemicals and these have been getting into the rivers, he said.\n\nSewell said skinks were in good shape in comparison to the rest of marine life but action was needed to fix the problem.\n\nbrittany.fletcher@news.com.au<endoftext>In the months prior to Donald Trump's election in November 2016, DNC employee Donna Brazile was outed in the media through legitimate documents released by the Guccifer 2.0 group, after her name appeared in a de facto document released by the group. This disclosure and others garnered public attention and raised major concerns with regards to election integrity. It is only now that the perpetrator of the breach has not been charged with crimes, and a lot of speculation and media attention was paid to the issue.\n\nGuccifer 2.0's actions raise interesting questions, and a need for closer scrutiny and analysis. In the following piece, I look at several ways in which Guccifer 2.0's choice to infiltrate and hack into the DNC may have been related to other operations, such as intelligence operations on US leaders and offensive cyber warfare operations.\n\nHISTORY AND ROOT\n\nIt should be well known by now that Guccifer 2.0 breached the Democratic Party on June 15, 2016. While leaked documents have reportedly questioned the exact scope of the hack, it was reportedly more sophisticated and stole more data than the original content of the phishing tool. The original phishing method was more targeted to

## 819 E.2 Prefix completion: "Generative models of text are very versatile: they can be used"

Generative models of text are very versatile: they can be used to write scripts, architectural descriptions, and even tackle tasks with long, seemingly unique documents, such as brainstorming sessions.\n\nA similar way of writing can be applied to nouns-heavy groups that are difficult to classify - and since generative writing offers less repetition, it also becomes faster.\n\nCategorizing common nouns\n\nCandidates, can you describe these three plants?\n\nBanana\n\nCanderella\n\nRaspberries\n\nTypes of plants Munngenum, Burdum,

Generative models of text are very versatile: they can be used in an undammed area or even in a mountainous terrain. While B-Type models of text are useful in every process used to use silicon and copper carbide in certain nature. G-Generative models are the thermal models of text which uses E-power. The G- models are highly useful in some environment type and they are available in market. E-Port models of text are the models of UAT text which can be perfectly easily extracted from the net. The E-Port is the UAT text that do not use a very energy-intensive process but

Generative models of text are very useful: they can be used to classify short sentences or free-form text, they can be used to understand meta-links, they can even be used to completely replace the manual search of the translation engines by automatically reading the entire documents and creating their own source tags, etc.\n\nUnlike dynamic models, the differential models of text do not require a lot of research and are easy to use. Whereas the predictive models are usually trained in an exhaustive way with limited training and modifications, the differential models can be easily automated, as the most popular models will try to identify the most often repeated places without

Generative models of text are very flexible: they can be used by anyone knowledgeable of a particular meaning and can keep evolving over time as everyone already superficially familiar with them is required to make the changes needed to create a new (negative) meaning. But the interpreted material's computational concepts must be accurately expressed in

the appropriate words to make sure the system they are being fed is able to properly conceptualize what they represent. Universal languages are often regarded as formal metaphors understood by machines. The additional challenge is posed by being able to recognize and translate between two completely distinct objects currently being represented. Computational methods to achieve this feat are

Generative models of text are very versatile: they can be used to create more complex effects like atmosphere or texture, where we would normally only use proxies. Historically, poly-responsive annotations have allowed us to create interactive content that extends the lineart of an image to become semi-transparent, without interfering with the images' colours, shadows, etc. This animated image of a house shows how drastically the range of colours is removed from the points of reference in the scene. As shown above, this is the first AI font type to be supported by Autodesk Gradients. We have also recently begun producing annotations of

Associative models of text are very versatile: they can be used for various purposes. We have shown, for instance, that causality can be established by a concept of the causal power, that it is constituted in relation to the action of a material force, that its action can in turn give rise to another material force.<sup>1</sup> But the concept of power depends in large measure on the concept of relation, and affirmative language depends not only on the concept of the internal and external action of the power; it also depends on the theory of the internal and external action of the other elements included in a relation.<sup>3</sup> If the concept is true,

Illustrative models of text are very powerful: they can be used to create impressions, convey ideas, as well as show the material connections and logical consequences of linguistic statements.<sup>2</sup> Rich and colorful images are often used for generating impressions and building ideas about objects. Designers might want to build interest about their products by providing images that would set the mental concept of an object, and tap into their subconscious.<sup>4</sup> Indeed, advertising is a brilliant model of persuasion through imitation. The first time we see an object that's been designed and manufactured in an advertising setting, we're introduced to all kinds of nonsense

Generative models of text are very versatile: they can be used as a data classification model and also incorporated into multiple data processing engines.<sup>5</sup> In this article, we present two new neural memory models capable of processing terabytes of data and the neural networks and computational techniques that are used in those models. Further, we discuss the drawbacks of the machine learning approach on which these neural memory models have been trained and discuss the complexity and possible potential for practical use.<sup>6</sup> Introduction Today, processing large-scale data is done using neural networks. The most widely used models are recurrent neural networks, which use training data and

### 884 E.3 Infilling: “A year ago in Paris, [...] Wow, what a great day!”

A year ago in Paris, I also met up with Ubisoft's very own Michael Abrash, helped test the next prototype of Loressseeker's dialogue, and helped bring the innovative Frostbite mechanic into the real world. Wow, what a great day!<sup>1</sup> As a gamer, one of the most fascinating things about making open-world games is the way players experience and react to the whole thing. When an open world is a procedural sandbox, everything you do while in the world, even those that seem like a small gesture at the time, have an impact. You can make choices that you wouldn't have on

A year ago in Paris, Catalonia, Spain, televised live live at 7pm PST/4pm EST. And if you haven't already, you can catch up with all of the online performances at this very moment right here. Wow, what a great day!<sup>2</sup> Songs: School of Dance & Speech at the Barcelona Perform Centre, Hope, Heathcote, Cadenka, Hirera & Hippocrates, Quinta Ad Astra Placeva, Divas in Motion, Figaro Romero, Spotify, Mascits sor Prenque, Soul Coffee, Pushwheel Project<sup>3</sup> Later on

A year ago in Paris, starting my business immediately after immigrating to the US. Almost 2 years later, I arrived in Charlottesville, earned a nutrition degree from the University of Virginia, and now run my own farming business from scratch. Wow, what a great day!<sup>4</sup> If you're looking for anything farm-friendly or artisanal to pick up while in Virginia, please check out Julia Mungo Grocery and be sure to visit the site for more information. Be sure to read our full review of Main Street Café's artisanal options, as well as menus (for “Earth Honey” and “Sun

A year ago in Paris, France, I gave a speech titled “True Attitude”. You can read it here.<sup>5</sup> 3 AM, oh, 3 AM. The sky's absolutely black, just a few stars. Wow, what a great day! Isn't it great? Is that how you feel every morning? At the end of consciousness, you enter a shift-beyond consciousness, like, infinite consciousness. You enter an absolute consciousness of nothingness, and it's a deafening silence. There's no kind of sound, anything, nothing, except for the silence. All kinds of interior thoughts

A year ago in Paris, March 2017, United States, entering the White House. So this is the first time ever in Paris, and this is the first time at the Vatican, and it's only my second international event. Wow, what a great day! It's great.<sup>6</sup> PALIN NICOLIAN GETSS TRUMP: And today, we were very honored to be invited to speak at the Paris International Economic Forum and I think that's an appropriate place to celebrate the courage and sacrifice of one of our greatest leaders, French Interior Minister Camaro, who at just 42 years old assassinated a terrorist

A year ago in Paris, when I used to work over here, I found myself messing around in the select committee rooms in the Senate, but this was the first time that I'd ever just sat in a committee room. Wow, what a great day!<sup>7</sup> The Transport, Science, and Technology Committee had some proposed legislation, Bill C-65, a amendment from Michael Croteau, who is known as the man from Quebec in the Senate, who is often actually here trying to propose legislation. Sitting with committee member Gaétan Atiyah, I found myself standing up in order to sit between him and

A year ago in Paris, the England team hardly ever lost. The first, second, third and fourth hardly ever lost as they turned up to World Athletics to build on their positive momentum for institutional change in elite sporting participation in England. Wow, what a great day!<sup>8</sup> This content is imported from YouTube. You may be able to find the same content in another format, or you may be able to find more information, at their web site.<sup>9</sup> This content is imported from YouTube. You may be able to find the same content in another format, or you may be able to find more information, at their web site.

A year ago in Paris, prior to the tournament, I went to Elijah's to eat and get drunk. Everyone in the venue was seventeen. I was there for a few minutes and then I went back to the event. Wow, what a great day! So relaxed and too

936 happy. I do not think I was always like that. Honestly, I live this life because I am a very content person. If I win  
 937 in a tournament and I rush off for the airport and fly for home, this is all I can do. When I lost my job, I would  
 938 feel an awful lot more than this. You see?

#### 939 **E.4 Word-level weights: “Let’s talk about law and medicine.” with 10× weight on “law”**

940 Let’s talk about law and medicine.\n\n\nIn her dissent, Justice Ron Sen, a veteran administrative law judge, points  
 941 out that the decision "ignores the fact that the original separation agreement was reached by binding arbitration"  
 942 that responded to "the legitimate ethical concerns of the university administration," which is what lies "at the heart  
 943 of law and medicine."\n\nSen’s dissent, meanwhile, argues that the final decision to retain school administrators -- a  
 944 decision all the interested parties wanted -- was "rational in light of the fact" that the confidentiality agreement  
 945 had been in place for years and involved a range of issues already addressed by the university.

946  
 947  
 948 Let’s talk about law and medicine. I’ll bet there’s a big difference between law and medicine, yes? Very good. I wrote  
 949 that. Medicine is a spiritual practice and basically involves treating another human being. Law is a legal activity  
 950 and basically involves signing a piece of paper. Okay. So that sounds like the healthiest way you’ll live your life.  
 951 Let’s say you want to buy your own gun, the first thing you must go through CA law is through a background check  
 952 carried out by the federal department hom & Is that it? YES. Got it. Gun dealers are required to have that approval.  
 953 Right, ever

954  
 955  
 956 Let’s talk about law and medicine. We just had a new decision the other day that said, in fact, the governor’s request  
 957 to declare a national emergency to protect gears and trooper and anthropoptic posts will in fact actually have to be  
 958 met on equal footing. What the governor is entitled to is instructing the federal government to fund the relief  
 959 activities under the Federal Emergency Management Act. So that means that he could go to the president of the United  
 960 States and say, president I’m going to have to declare a state of emergency. Hey, can you pay for it? He also can be  
 961 allowed to stand on equal footing with

962  
 963  
 964 Let’s talk about law and medicine. They say, “I worry more about regulation than I worry about law.” And I have posed  
 965 this question to people across the country, and we actually go through the exercise of asking this question, and then  
 966 we have totally distinct versions of law and regulation or law and medicine, totally distinct things. And that  
 967 advances my proposition that there is this cognitive dissonance, so you tend to be more concerned about the  
 968 law.\n\nWhen we talk about democracy, and I’ve talked about this, we say: “Someone, someone, helped humanity find and  
 969 develop the laws and practices that work best in

970  
 971  
 972 See’s statement about law and medicine.\n\nHe also urged all senators to support ethics oversight of nominees even if  
 973 they don’t abide by the chamber’s super-majority rule. Republicans ran the chamber now but had just enough votes to  
 974 get a vote on the proposal in December.\n\nThe Brennan Center is a partner in a coalition joining the District of  
 975 Columbia and 20 states for its Acts for Integrity project. It aims to lay out rigorous ethical standards for lawyers  
 976 joining the judiciary annually.\n\nObama noted in Lowell that the center had devoted \ \$1 million to assigning ethics  
 977 lawyers to nominees to lower courts but also directly

978  
 979  
 980 Let’s talk about law and medicine. At present, there is a considerable amount of attention being paid by the criminal  
 981 justice community to the fact that drug sentences have not changed during the Obama administration. What is not  
 982 mentioned, however, is that the Administration has been willing to make whatever changes are necessary to spare  
 983 individuals from going to prison for low-level drug offenses and, when convicted, minor offenses.\n\nBefore this  
 984 policy of mitigation and rehabilitation was in place, the majority of defendants who chose to contest felony drug  
 985 charges either pleaded guilty in court or enter guilty pleas under both state and federal rule. In addition,  
 986 prosecutors would take the chance

987  
 988  
 989 Let’s talk about law and medicine.\n\nBecker’s resolution puts forth a message for Americans that law and cybersecurity  
 990 are not mutually exclusive things. It acknowledges there is a role for government and that citizens have  
 991 responsibilities to one another. It also reminds the citizenry that they are the true law-makers, and should look  
 992 outside government agencies to offer them those responsibilities. And if politicians can restore notions of mutual  
 993 trust, citizens can also hold leaders accountable for their actions through the political process.\n\nRestoring trust  
 994 in the American justice system may have global consequences as well. China’s push for espionage may become harder as  
 995 more Americans like Be

996  
 997  
 998 Let’s talk about law and medicine.\n\nDo not worry if you find Reason approaches to your observation and experience.  
 999 And for people wishing to satisfy their own curiosity, there are other sources here.\n\nSpeaking scientifically is a  
 1000 statement of fact, not evidence of knowledge. It is also a statement of law.\n\nJason Saunders is a best-selling  
 1001 author and science columnist for Singularism Newspaper.<endoftext>For the first post in a new series, I  
 1002 would like to sincerely express a great deal of thanks to everyone who has helped make this project possible. It  
 1003 started as a small group of friends and family that will likely never

#### 1004 **E.5 Word-level weights: “Let’s talk about law and medicine.” with 10× weight on “medicine”**

1005 Let’s talk about law and medicine. In this show, we’re discussing medical care, the relationship  
 1006 between law and medicine, the use of law and medicine, and more. Medicine, of course, is a scientific process. It’s  
 1007 the combination of the tools of science that we have available and the knowledge we’ve acquired from being involved in  
 1008 our natural world on a day by day basis. Law is a process that is generally based on the physical representation of  
 1009 biological issues in health and disease. There are legal procedures established to punish or convict certain parties  
 1010 for certain offenses. Society and legal community are involved for court and criminal governance. This kind  
 1011

1012  
 1013 Let’s talk about law and medicine.\n\nTop Facts Among the things that are quite amazing about research and medicine is  
 1014 its ability to improve the lives of people. When it comes to technology and life sciences there is a fairly long list  
 1015 of advances that have resulted from research and science.\n\nResearch has brought about incredible advancement in  
 1016 science and technology, which has helped to ameliorate various aspects of life. Research has also helped to diagnose  
 1017 various kinds of disease including cancer, diabetes, and other diseases. It has also helped in preventing pathogens  
 1018 that can lead to diseases. Life scientists have always relied on research as a source to help  
 1019

1020  
 1021 Let’s talk about law and medicine. One of the promises he made soon after winning the presidential vote was to



1022 establish a health ministry. In May 2018, he appointed Nysa Demribay, head of the directorate of health, and Dr. Celal  
1023 Kilimbağlı, head of the department of public sciences, to appoint the head of the health ministry. Since he  
1024 transitioned to the presidency, he has made important decisions regarding health and disease control. We will see how  
1025 they responded.\n\nHealth control\n\nPektra promised on several occasions as prime minister, including to take  
1026 responsibility for  
1027  
1028  
1029 Let's talk about law and medicine.\n\nIn part because of advancements in technology, personal information about medical  
1030 and drug use is spreading. Healthcare professionals across the nation rely on this personal data to make decisions  
1031 about drug prescriptions and clinical trials and monitor people at immediate risk of serious or chronic diseases. The  
1032 data provides a unique snapshot of an individual's health status, revealing information about health history, risk  
1033 factors, and treatment options.\n\nYet collecting and analyzing patient data can be a challenging task for physicians  
1034 and medical professionals. Current and future developments in areas like data science and analysis, artificial  
1035 intelligence, and machine learning will improve their ability to  
1036  
1037  
1038 Let's talk about law and medicine.\n\nThe study found mixed sex partners have less risk of being diagnosed. About 25  
1039 percent of colorectal cancer cases were found in mixed sex partners, who are more likely to be women. The rates were  
1040 found much lower in heterosexual partners.\n\nWhile the findings won't make a difference in medical care, they could  
1041 make a significant contribution to prevention among people at risk for colon and colorectal cancer.\n\nGetty  
1042 Images\n\nIf we begin to understand more about potential risks, we might be able to promote specific lifestyle  
1043 changes, changes that may reduce the risks for cancer  
1044  
1045  
1046 Let's talk about law and medicine.\n\nYour emergency room physician makes decisions on your behalf. As physicians,  
1047 nurses and like most health care providers, we recognize that what we do in the emergency room affects patient privacy  
1048 and safety. Legal issues can also influence our commitment to ethical guidelines and confront providers with legal  
1049 concerns like liability and liability.\n\nIn recent years, we've seen an increasing discussion about the relationship  
1050 between law and medicine, especially as we see the growth of expanded practice based and managed care medicine. Many  
1051 providers are concerned with patient privacy, protecting patient rights and facilitating doctor-patient dialogue. This  
1052 issue gives us exciting opportunities including  
1053  
1054  
1055 Let's talk about law and medicine.\n\nMagnusson analyzed environmental factors from medical records tracking the health  
1056 of tens of thousands of people with congestive heart failure. The approach was developed using the largest array of  
1057 sequencing information available.\n\nAlthough most genetic work focuses on identifying the genetic basis of disease,  
1058 previous studies have typically examined confounders for both environment and health and identified either influences  
1059 on health that are genetically independent or environmental factors that correlated with underlying conditions,"  
1060 Magnusson said. "The unique amount of data our Genetic Analyses approach provided enabled us to better understand the  
1061 role of environmental factors in congestive  
1062  
1063  
1064 Let's talk about law and medicine.\n\nResearchers said the discovery was that different brain regions are activated at  
1065 lower volume in people with diets in better health, and people who eat most healthily have a larger dentate gyrus, a  
1066 section of the brain with executive functions.\n\nAdvertisement\n\nExecutive functions play important roles in the  
1067 healthy brain by controlling the appetite.\n\nThe scientist also said they found that concentrations of the hormones  
1068 insulin and glucose dropped in people with an eating disorder relative to people who have healthy hormones.\n\nThe  
1069 brain volume devoted to social contact, or networking circuitry, dropped in volume in most

## 1070 E.6 Lexical constraints: "Donald" anywhere

1071 : The race in graphics PA POLITICS PERSON Election. Picture date: Thursday December 12 2019 2019. See PA PA story UK  
1072 General Election 2019. Photo credit should read: Donald Taylor/PA Wire Donald Taylor PA Wire UK General Election  
1073 2019: The race in graphics PA POLITICS PERSECT Election. Picture date: Thursday December 18 December 2019. See PA PA  
1074 story UK General Election 2019. Photo credit should read: Darren House/PA Wire Darren House PA Wire UK General  
1075 Election 2019: The campaign in graphics PA POLITICS PERSACE Election. Picture date: 1900 December 13 2019 British  
1076 Women for Social Change Laura Brown PA Wire UK  
1077  
1078  
1079 . In all, Halloween earned a stunning \$50.4 million despite taking place on Skid Row and having only a \$2 million  
1080 production budget.\n\nAt the end of November, Halloween 2 starring Michael Myers, John Cena, Owen Teague, Ewan  
1081 McGregor, Adam DeVane, Justin Long, Judy Greer, Jeff Daniels, Jonathan Levine, Donald Pleasence and Nick Jonas,  
1082 earned an additional \$36.3 million in its second weekend to set another all-time record.\n\nHalloween began in 1978  
1083 as a one-off event at the skate park run by original Halloween creator John Carpenter. Since  
1084  
1085  
1086 , Photographed by Sam Bloom) Dennis Antony Donald Stannard\n\n\n\nPanelist Appearances\n\nDennis Antony is an assistant  
1087 professor at Salt Lake City Community College in Park City, Utah. He is a Jewish Siberian anthropologist and author  
1088 of The Hunger Revolution, which explores the social history of the Russian Socialist Revolution.\n\nDonald Stoddard  
1089 is an Associate Instructor of Sociology at the State University of New York at Morehouse Dightaway. He is the  
1090 co-author of the forthcoming: Nation in Crisis: Struggles of Diaspora Race/Ethno  
1091  
1092  
1093 Her work has been featured on PBS One, the television network of Donald J. Smith NFP, Straight Talk with Dr. Michael  
1094 Gee on San Antonio Public Television and steptalk.com/live-together/. \n\nHer landscape nominations include: The Dr.  
1095 Oscar Crowley Center, 221 N. Sunset; the Sam Houston Center, 300 N. Rio Grande, San Antonio; John P. Yee Memorial,  
1096 2817 Alamosa; Truman Presidential Center, 800-F Alamosa Ave.; Sam Houston Memorial, 400 W. Sam Houston Blvd.; Mt. Hood  
1097 National Historic Cemetery, 500 E. Mt  
1098  
1099  
1100 ating.</endoftext>Republican nominee Donald Trump continued his campaign attacks on Democratic nominee  
1101 Hillary Clinton on Wednesday, suggesting she used a private email system while she was president.\n\nIf ever she  
1102 cheated, she did it from office, relying on her private email server," Trump tweeted Wednesday.\n\nInstead of fighting  
1103 for the presidency," Trump added in his tweet.\n\nTrump also mocked Clinton's sudden and very terse release of her  
1104 speech addressing the FBI earlier this month, saying that the fact presidents relied on a private email system in  
1105 office directly contradicts Clinton's claim that she declined to turn over a server.\n\nWas  
1106  
1107  
1108 obvious personal interest and involvement in the production." \n\nMeanwhile, the financial lawyers behind the lawsuit,  
1109 who represent other film executives claiming to have ties to Donald Trump through individuals like Gordon, disputed  
1110 Mr. Whelan's allegations. Clayton Brokerage, the firm representing executives, wrote in an email, "We never received,

nor knowingly sought, any money from Mr. Trump. He is sitting on any source of dark money.”\n\nWhile some Hollywood executives seized the opportunity to uncover new details of Donald Trump’s alleged interests in their projects, many were unconcerned with some of the claims that emerged from the damning videos. Opp

on March 30th, which was upheld by the appeals court a week later. Trump has until June 9th to modify the order or send the case back to the lower court.\n\n\nAlso facing legal challenges is Donald Trump’s executive order banning immigration from seven Muslim-majority countries that is facing a temporary halt, with nothing scheduled to go into effect. Two federal judges have ruled that such an order violates the establishment clause. Among the plaintiffs are Chad, Costa Rica, Venezuela, Libya, Mongolia, Somalia and South Korea. Earlier this month, a spokesperson for the Department of Customs and Border Protection rejected claims that the order is based on

both previously denied that their sinister actions amounted to witness ‘tampering’, and that the documents seized from Priestap were actually destroyed before his firing was made publicly known.\n\nA special prosecutor was appointed by US AG Jeff Sessions in May to investigate the fateful leak of more than 600 pages of now-classified emails sent from Priestap to unidentified FBI lawyer Lisa Page on Christmas Eve 2016.\n\nBishopap had served as chief for two years of the FBI counterintelligence division in Cincinnati before he was fired by Donald Trump.\n\nEarlier in May, US Attorney General Jeff Sessions released the confidential evidence seized from Priestap’

## 1130 E.7 Negation: “Donald” anywhere and “Trump” nowhere

s draft stock fell significantly after he landed at No. 16, joined by former Arkansas stars like John Conner, Aaron Donald, Roy Williams and Derrick Coleman in being left undrafted after sitting out.\n\nBut Henderson knows he has work to do in his senior season.\n\n“‘It was very surprising,” said Henderson about his draft ranking. “The No. 16 spot was a huge accomplishment for me. Just because ... No. 16. That’s all that mattered.”\n\nWe have a good core of young guys, so there’s a lot of excitement on offense, but I wanted to bounce back on defense.

and corporations.\n\nThe cybersecurity story is going to be up there in the annals of this country, with all its horror stories,” said Valentine, now vice president for global development at Dupont Truck and Trucks. “Nobody was prepared for mobilization, especially at a large scale.”\n\nAdvertisement\n\nA month later, with little time to spare, the government hired Donald V. Davis, a former senior aide to Senator Tom Mondale of Minnesota and former Chief Security Operations Officer at the White House, to lead tactical centers.\n\nTwo months later, a comprehensive plan was announced. Only the most experienced engineers

\n\nEthnicity -- Ethnarch -- \n\n1. Michael Domenici 43 Jan 1992 2. George Clinton 70 1923 3. Hillary Clinton 47 Jan 2001 4. Ted Kennedy 48 1969 5. Mark Thornburgh 44 Jan 1975 6. John Kerry 41 1970 7. William Dodd 42 1934 8. John Komen 42 1934 9. John Kerry 53 Nov. 1992 10. Dick Gephardt 41 1913 11. John Kerry 47 1999 12. James Kilpatrick 44 1941 13. Dick Durbin 40 1942 14. Chris Dodd 42 Nov. 1992 15. Joe Biden 49 1968 16. George W

daily Le Parisien published a diplomatic cable revealing that there is close cooperation between the French government and American charity organizations financed by the most powerful research donor in France France George Soros. Iraq International Congregate George Polis, the director of one of these two organizations, is involved in the government’s efforts to make this film.\n\nA recent Belgian Bulletin report revealed that, at the American NGO France Hillary Soros, Olivier Klein is aware of a project that helps pay for news about Israeli attitudes towards the Holocaust.\n\nThe Hollande government also funds the production of a show about Armenian genocide set in France. The show is called

. \n\nMaggie Edgeley, who plays Lady Arianne-Laghardt and Anne Boleyn on “Thrones,” is being eyed to play Queen Cersei Baratheon. \n\nTessa Wilson, who plays Lady Arianne and King Robert Baratheon’s mother on the HBO series, is tipped to play Prime Minister Hillary Goodmayne, who gave up the job last month after losing a bid for the Conservative Party leadership. \n\nSilvio Cervino, who is married to Thomas von Gasparotto, has been eyed to portray Lady Lyanna Darvald

it, and that just fired me up. I know I’m probably not making it across the line at this point, but I got a friend that’s about to make a movie that’ll set in New York City in the 1970s and he told me, ‘you just got Donald McConnell killed.’ I said, ‘You know something, man? I think you got heart.’” Donnelly: “I don’t want to talk about him.” Fawcett: “It’s sad, y’know, for me. It’s sad for the chosen voter. And frankly, it’s sad for

is relevant. In the information and technology age, the dynamics of the media and communication are radically changed. We must maintain a careful yet balanced balance between censorship and regulation in this space and ensure the integrity and self conduct of the media,” concludes the paper. \n\nThis paper, entitled “The Altmedia,” appearing in the webzine Journal of Communication, was edited by Hans-Ulf Carnes, Professor of International Politics and Peace Studies at the University of California, and authored by George Argill, Robert Branch, David Funk, Donald Grantman, Amalia Haba, John Lindsay, and Richard Wallace. The journal

one. When talk turned to Six Flags, local sportswriters and activists criticized the park for staying in business in the aftermath of the Michael Brown and Eric Garner police killings. Brown was also criticized for his failure to invite the convicted Donald Sterling protester during his 2016 Sterling Pledge. When I asked Brown in November why he chose to reach out to Kaepernick, for lack of a better explanation, despite his having indicated otherwise, Brown replied, “We haven’t changed our core values.” Drawing Kaepernick to speak, he said, was a small step in an attempt to reincorporate Six Flags as an accepting place. Share
